# Supplementary material for: Molecular epidemiology of coagulase-negative Staphylococcus species isolated at different lactation stages from dairy cattle in the United States
Source: PeerJ. 2019 May 6;7:e6749. doi: 10.7717/peerj.6749 (PMC6507897; doi:10.7717/peerj.6749)
Supplement: Dataset S1 — The spreadsheet “RawData” contains the raw data and the spreadsheet “Dictionary” contains the definitions for acronyms used in the raw data. [file peerj-07-6749-s002.xlsx]

## Sheet: RawData
DAIRY ID	Cow ID	Quarter	rpoß ID	Stage &	Presumptive CNS classification	Speciation PCR &Sequencing	PFGE Pulsotype
CA1	26755	RF	492	S1	CNS	Excluded/Not submitted for sequencing	#N/A
CA1	29755	LF	514	S1	CNS	Excluded/Not submitted for sequencing	#N/A
CA1	30282	LR	531	S1	CNS	Excluded/Not submitted for sequencing	#N/A
CA1	30774	LF	482	S1	CNS	Excluded/Not submitted for sequencing	#N/A
CA2	6450	RR	56	S1	CNS	Excluded/Not submitted for sequencing	#N/A
CA2	7038	LF	65	S1	CNS	Excluded/Not submitted for sequencing	#N/A
CA2	7038	RR	64	S1	CNS	Excluded/Not submitted for sequencing	#N/A
CA2	8440	LR	33	S1	CNS	Excluded/Not submitted for sequencing	#N/A
CA2	8466	RR	60	S1	CNS	Excluded/Not submitted for sequencing	#N/A
CA2	8633	RR	37	S1	CNS	Excluded/Not submitted for sequencing	#N/A
MN	6433	LR	322	S1	CNS	Excluded/Not submitted for sequencing	#N/A
MN	6445	RR	317	S1	CNS	Excluded/Not submitted for sequencing	#N/A
MN	7443	LF	333	S1	CNS	Excluded/Not submitted for sequencing	#N/A
MN	7472	LF	338	S1	CNS	Excluded/Not submitted for sequencing	#N/A
MN	8263	LF	312	S1	CNS	Excluded/Not submitted for sequencing	#N/A
MN	8296	LF	326	S1	CNS	Excluded/Not submitted for sequencing	#N/A
MN	8303	RR	323	S1	CNS	Excluded/Not submitted for sequencing	#N/A
MN	8337	LR	737	S1	CNS	Excluded/Not submitted for sequencing	#N/A
MN	8370	LF	358	S1	CNS	Excluded/Not submitted for sequencing	#N/A
WI1	1124	RF	188	S1	CNS	Excluded/Not submitted for sequencing	#N/A
WI1	6861	LR	180	S1	CNS	Excluded/Not submitted for sequencing	#N/A
WI1	9338	RF	209	S1	CNS	Excluded/Not submitted for sequencing	#N/A
WI1	9475	RR	173	S1	CNS	Excluded/Not submitted for sequencing	#N/A
WI1	9522	LR	193	S1	CNS	Excluded/Not submitted for sequencing	#N/A
CA1	25535	LF	523	S1	CNS	Excluded/Not submitted for sequencing	#N/A
CA1	28073	LF	497	S1	CNS	Excluded/Not submitted for sequencing	#N/A
CA1	29194	RR	731	S1	CNS	Excluded/Not submitted for sequencing	#N/A
CA1	29617	RF	496	S1	CNS	Excluded/Not submitted for sequencing	#N/A
CA1	31357	LF	493	S1	CNS	Excluded/Not submitted for sequencing	#N/A
CA2	7856	RR	9	S1	CNS	Excluded/Not submitted for sequencing	#N/A
CA2	8338	RF	23	S1	COR	Excluded/Not submitted for sequencing	#N/A
CA2	8454	RF	13	S1	COR	Excluded/Not submitted for sequencing	#N/A
IA	14629	LR	720	S1	CNS	Excluded/Not submitted for sequencing	#N/A
IA	14827	LF	627	S1	CNS	Excluded/Not submitted for sequencing	#N/A
MN	1915	RF	339	S1	CNS	Excluded/Not submitted for sequencing	#N/A
MN	5338	RR	340	S1	CNS	Excluded/Not submitted for sequencing	#N/A
MN	8387	RR	344	S1	CNS	Excluded/Not submitted for sequencing	#N/A
MN	8484	RR	352	S1	CNS	Excluded/Not submitted for sequencing	#N/A
WI1	1095	LF	206	S1	CNS	Excluded/Not submitted for sequencing	#N/A
WI1	1446	LF	162	S1	CNS	Excluded/Not submitted for sequencing	#N/A
WI1	1446	LR	159	S1	CNS	Excluded/Not submitted for sequencing	#N/A
WI1	9581	LR	302	S1	CNS	Excluded/Not submitted for sequencing	#N/A
CA1	25103	LR	532	S2	CNS	Excluded/Not submitted for sequencing	#N/A
CA1	31104	LR	535	S2	CNS	Excluded/Not submitted for sequencing	#N/A
CA2	1780	LF	126	S2	CNS	Excluded/Not submitted for sequencing	#N/A
CA2	4814	RR	88	S2	CNS	Excluded/Not submitted for sequencing	#N/A
CA2	7205	LF	119	S2	CNS	Excluded/Not submitted for sequencing	#N/A
CA2	7887	RF	87	S2	CNS	Excluded/Not submitted for sequencing	#N/A
CA2	8340	LF	140	S2	CNS	Excluded/Not submitted for sequencing	#N/A
CA2	8627	RR	122	S2	CNS	Excluded/Not submitted for sequencing	#N/A
IA	8572	RR	683	S2	CNS	Excluded/Not submitted for sequencing	#N/A
IA	13060	LR	700	S2	CNS	Excluded/Not submitted for sequencing	#N/A
IA	13095	RR	670	S2	CNS	Excluded/Not submitted for sequencing	#N/A
IA	13787	LF	650	S2	CNS	Excluded/Not submitted for sequencing	#N/A
IA	14345	LR	617	S2	CNS	Excluded/Not submitted for sequencing	#N/A
IA	14420	RR	653	S2	CNS	Excluded/Not submitted for sequencing	#N/A
IA	14420	LF	652	S2	CNS	Excluded/Not submitted for sequencing	#N/A
MN	228	LR	738	S2	CNS	Excluded/Not submitted for sequencing	#N/A
MN	6096	LR	359	S2	CNS	Excluded/Not submitted for sequencing	#N/A
MN	7362	LF	743	S2	CNS	Excluded/Not submitted for sequencing	#N/A
MN	8197	RF	450	S2	CNS	Excluded/Not submitted for sequencing	#N/A
MN	8387	RR	398	S2	CNS	Excluded/Not submitted for sequencing	#N/A
MN	8911	RR	367	S2	CNS	Excluded/Not submitted for sequencing	#N/A
WI1	1655	LR	177	S2	CNS	Excluded/Not submitted for sequencing	#N/A
CA1	28145	RF	574	S2	CNS	Excluded/Not submitted for sequencing	#N/A
CA1	29539	LR	530	S2	CNS	Excluded/Not submitted for sequencing	#N/A
CA1	29570	LF	551	S2	CNS	Excluded/Not submitted for sequencing	#N/A
CA1	31075	RR	555	S2	CNS	Excluded/Not submitted for sequencing	#N/A
CA1	31217	LR	595	S2	CNS	Excluded/Not submitted for sequencing	#N/A
IA	12965	RF	699	S2	CNS	Excluded/Not submitted for sequencing	#N/A
IA	14217	LR	702	S2	CNS	Excluded/Not submitted for sequencing	#N/A
MN	8573	RF	444	S2	CNS	Excluded/Not submitted for sequencing	#N/A
WI1	1554	LF	218	S2	CNS	Excluded/Not submitted for sequencing	#N/A
WI1	9109	LF	284	S2	CNS	Excluded/Not submitted for sequencing	#N/A
CA1	29483	RR	533	S3	CNS	Excluded/Not submitted for sequencing	#N/A
CA1	31284	RF	580	S3	CNS	Excluded/Not submitted for sequencing	#N/A
CA2	3145	RR	83	S3	CNS	Excluded/Not submitted for sequencing	#N/A
CA2	7305	RF	132	S3	CNS	Excluded/Not submitted for sequencing	#N/A
CA2	8455	LF	134	S3	CNS	Excluded/Not submitted for sequencing	#N/A
CA2	8524	RF	143	S3	CNS	Excluded/Not submitted for sequencing	#N/A
IA	1493	RR	681	S3	CNS	Excluded/Not submitted for sequencing	#N/A
IA	11364	LR	657	S3	CNS	Excluded/Not submitted for sequencing	#N/A
IA	12730	RF	685	S3	CNS	Excluded/Not submitted for sequencing	#N/A
IA	13360	LR	693	S3	CNS	Excluded/Not submitted for sequencing	#N/A
IA	14037	LF	648	S3	CNS	Excluded/Not submitted for sequencing	#N/A
IA	14749	LF	705	S3	CNS	Excluded/Not submitted for sequencing	#N/A
MN	228	RF	425	S3	CNS	Excluded/Not submitted for sequencing	#N/A
MN	5011	LF	380	S3	CNS	Excluded/Not submitted for sequencing	#N/A
MN	6231	LR	402	S3	CNS	Excluded/Not submitted for sequencing	#N/A
MN	7295	RR	410	S3	CNS	Excluded/Not submitted for sequencing	#N/A
MN	7362	LF	456	S3	CNS	Excluded/Not submitted for sequencing	#N/A
MN	8039	RF	426	S3	CNS	Excluded/Not submitted for sequencing	#N/A
MN	8520	RR	428	S3	CNS	Excluded/Not submitted for sequencing	#N/A
MN	8520	LR	742	S3	CNS	Excluded/Not submitted for sequencing	#N/A
WI1	1511	RR	228	S3	CNS	Excluded/Not submitted for sequencing	#N/A
WI1	1645	LR	255	S3	CNS	Excluded/Not submitted for sequencing	#N/A
WI1	1662	LR	264	S3	CNS	Excluded/Not submitted for sequencing	#N/A
WI1	1667	LF	256	S3	CNS	Excluded/Not submitted for sequencing	#N/A
WI1	8803	RR	735	S3	CNS	Excluded/Not submitted for sequencing	#N/A
CA1	28303	LR	549	S3	CNS	Excluded/Not submitted for sequencing	#N/A
CA1	29711	LR	575	S3	CNS	Excluded/Not submitted for sequencing	#N/A
CA1	30375	RF	576	S3	CNS	Excluded/Not submitted for sequencing	#N/A
CA1	30487	LF	541	S3	CNS	Excluded/Not submitted for sequencing	#N/A
CA1	31075	RR	552	S3	CNS	Excluded/Not submitted for sequencing	#N/A
IA	1711	RF	654	S3	CNS	Excluded/Not submitted for sequencing	#N/A
IA	11572	LR	703	S3	CNS	Excluded/Not submitted for sequencing	#N/A
IA	12265	LF	729	S3	CNS	Excluded/Not submitted for sequencing	#N/A
IA	13108	LR	692	S3	CNS	Excluded/Not submitted for sequencing	#N/A
IA	14623	LR	704	S3	CNS	Excluded/Not submitted for sequencing	#N/A
MN	6219	RF	403	S3	CNS	Excluded/Not submitted for sequencing	#N/A
MN	7098	LF	411	S3	CNS	Excluded/Not submitted for sequencing	#N/A
MN	7460	RR	421	S3	CNS	Excluded/Not submitted for sequencing	#N/A
WI1	1637	RR	202	S3	CNS	Excluded/Not submitted for sequencing	#N/A
WI1	1655	LR	223	S3	CNS	Excluded/Not submitted for sequencing	#N/A
WI1	1735	LR	245	S3	CNS	Excluded/Not submitted for sequencing	#N/A
CA1	16685	RF	470	S1	CNS	Micrococcus	#N/A
MN	8247	RF	350	S1	CNS	Micrococcus	#N/A
CA1	28993	LF	569	S2	CNS	Micrococcus	#N/A
CA1	29555	RF	581	S2	CNS	Micrococcus	#N/A
CA2	4375	RF	137	S2	CNS	Micrococcus	#N/A
CA2	6556	LF	101	S2	CNS	Micrococcus	#N/A
CA2	7205	RR	118	S2	CNS	Micrococcus	#N/A
CA2	7264	RR	120	S2	CNS	Micrococcus	#N/A
CA2	8178	LF	125	S2	CNS	Micrococcus	#N/A
CA2	8340	LR	139	S2	CNS	Micrococcus	#N/A
CA2	8455	RR	19	S2	CNS	Micrococcus	#N/A
CA1	28860	RF	468	S3	CNS	Micrococcus	#N/A
CA1	28880	LR	577	S3	CNS	Micrococcus	#N/A
CA2	61	LR	129	S3	CNS	Micrococcus	#N/A
CA2	6949	RF	78	S3	CNS	Micrococcus	#N/A
CA2	7205	LF	144	S3	CNS	Micrococcus	#N/A
CA2	7271	RF	93	S3	CNS	Micrococcus	#N/A
CA2	7974	RF	146	S3	CNS	Micrococcus	#N/A
MN	7098	RF	419	S3	CNS	Micrococcus	#N/A
MN	8613	LR	455	S3	CNS	Micrococcus	#N/A
CA1	28395	RF	490	S1	CNS	S. aureus	#N/A
IA	832	RF	668	S2	CNS	S. aureus	#N/A
CA1	27661	RR	578	S3	CNS	S. aureus	#N/A
CA1	28051	RF	579	S3	CNS	S. aureus	#N/A
IA	12985	RR	609	S2	CNS	S. auricularis	1
MN	8586	LF	461	CM	CNS	S. auricularis	#N/A
MN	8508	LF	408	S3	CNS	S. auricularis	2
MN	8303	RF	330	S1	CNS	S. auricularis	#N/A
WI1	9892	RF	287	S1	CNS	S. auricularis	#N/A
MN	4351	RR	375	S3	CNS	S. auricularis	3
IA	13342	LF	665	S2	CNS	S. auricularis	4
IA	14425	RR	672	S2	CNS	S. auricularis	3
IA	14626	RR	635	S2	CNS	S. auricularis	6
MN	8218	RR	447	S2	CNS	S. auricularis	#N/A
MN	8308	LR	437	S2	CNS	S. auricularis	#N/A
MN	8440	RR	395	S2	CNS	S. auricularis	#N/A
MN	8546	RF	440	S2	CNS	S. auricularis	#N/A
WI1	1533	LF	220	S2	CNS	S. auricularis	#N/A
MN	8306	RR	423	S3	CNS	S. auricularis	7
IA	11972	LF	706	S3	CNS	S. auricularis	#N/A
MN	7295	LF	463	CM	CNS	S. auricularis	8
MN	6186	RR	414	S3	CNS	S. auricularis	#N/A
MN	6231	LF	400	S3	CNS	S. auricularis	#N/A
MN	7254	RR	422	S3	CNS	S. auricularis	#N/A
IA	14349	RF	622	S1	CNS	S. auricularis	9
MN	8463	LR	451	S3	CNS	S. auricularis	#N/A
MN	8502	RR	418	S3	CNS	S. auricularis	#N/A
CA2	6579	RR	74	S2	CNS	S. auricularis	10
WI1	9529	LF	259	S3	CNS	S. auricularis	#N/A
CA2	6594	RR	52	S1	CNS	S. capitis	#N/A
CA2	8455	RR	18	S1	CNS	S. capitis	6
IA	12951	LR	725	S1	CNS	S. capitis	4
MN	2500	LF	347	S1	CNS	S. capitis	#N/A
MN	7356	LR	335	S1	CNS	S. capitis	2
MN	8232	RR	397	S2	CNS	S. capitis	#N/A
MN	8508	LR	741	S2	CNS	S. capitis	5
CA2	6556	RF	127	S3	CNS	S. capitis	#N/A
CA2	6556	LR	128	S3	CNS	S. capitis	#N/A
CA2	8115	RF	131	S3	CNS	S. capitis	3
MN	6231	RF	401	S3	CNS	S. capitis	1
CA2	4826	LR	115	S2	CNS	S. chromogenes	0
CA1	24457	LR	499	S1	CNS	S. chromogenes	#N/A
CA1	31083	RF	488	S1	CNS	S. chromogenes	#N/A
IA	13164	LF	730	S1	CNS	S. chromogenes	#N/A
IA	14305	RF	651	S1	CNS	S. chromogenes	#N/A
CA2	6766	RR	103	S2	CNS	S. chromogenes	0
CA2	6960	LR	117	S2	CNS	S. chromogenes	0
CA2	7264	LR	123	S2	CNS	S. chromogenes	0
CA2	7974	RF	114	S2	CNS	S. chromogenes	0
CA2	8259	RF	113	S2	CNS	S. chromogenes	0
CA2	8612	RF	100	S2	CNS	S. chromogenes	0
CA2	8627	LR	121	S2	CNS	S. chromogenes	0
CA2	1563	LF	110	S3	CNS	S. chromogenes	0
CA2	1563	RF	111	S3	CNS	S. chromogenes	0
CA2	4826	LR	141	S3	CNS	S. chromogenes	0
CA2	7925	RF	133	S3	CNS	S. chromogenes	0
CA2	8432	LF	107	S3	CNS	S. chromogenes	0
CA2	8447	LF	108	S3	CNS	S. chromogenes	0
CA2	8455	RF	135	S3	CNS	S. chromogenes	0
CA2	8612	RF	130	S3	CNS	S. chromogenes	0
IA	12855	RF	691	S3	CNS	S. chromogenes	1
CA1	26393	RF	585	S3	CNS	S. chromogenes	2
CA1	27894	lf	594	S3	CNS	S. chromogenes	3
CA2	8447	LF	58	S1	CNS	S. chromogenes	4
CA2	7264	RF	28	S1	CNS	S. chromogenes	5
WI1	1124	LR	181	S1	CNS	S. chromogenes	5
MN	6250	LF	454	S3	CNS	S. chromogenes	5
IA	14639	RR	721	S1	CNS	S. chromogenes	6
IA	14359	LF	694	S3	CNS	S. chromogenes	6
CA1	29523	LF	475	S1	CNS	S. chromogenes	7
CA2	6604	LR	25	S1	CNS	S. chromogenes	7
WI1	1479	RF	190	S1	CNS	S. chromogenes	7
CA1	24621	LF	568	S2	CNS	S. chromogenes	7
IA	11364	RF	658	S3	CNS	S. chromogenes	7
CA1	29762	LR	584	S3	CNS	S. chromogenes	8
MN	7033	RF	406	S3	CNS	S. chromogenes	8
CA1	29007	LR/LF	517	S1	CNS	S. chromogenes	9
CA1	31003	RF	494	S1	CNS	S. chromogenes	9
IA	11367	LR	659	S3	CNS	S. chromogenes	9
IA	13233	LR	602	S1	CNS	S. chromogenes	10
MN	5338	RR	343	S1	CNS	S. chromogenes	11
MN	6231	LF	739	S2	CNS	S. chromogenes	11
MN	7356	RR	393	S2	CNS	S. chromogenes	11
WI1	1645	RR	273	S3	CNS	S. chromogenes	11
IA	14542	RR	601	S1	CNS	S. chromogenes	12
CA1	31330	LF	556	S3	CNS	S. chromogenes	12
CA2	420	RR	94	S3	CNS	S. chromogenes	13
CA2	4417	RF	24	S1	CNS	S. chromogenes	#N/A
CA1	27198	RF	504	S1	CNS	S. chromogenes	14
CA1	30282	LR	476	S1	CNS	S. chromogenes	15
CA1	28028	LR	560	S2	CNS	S. chromogenes	16
CA2	8338	LF	67	S2	CNS	S. chromogenes	17
CA2	6960	RR	6	S1	CNS	S. chromogenes	#N/A
CA2	8338	LF	69	S3	CNS	S. chromogenes	17
CA1	28862	RF	525	S1	CNS	S. chromogenes	18
CA1	31328	RR	526	S1	CNS	S. chromogenes	18
CA2	6604	RR	26	S1	CNS	S. chromogenes	19
CA1	29071	rf	590	S2	CNS	S. chromogenes	19
IA	14511	RR	624	S1	CNS	S. chromogenes	20
CA2	8394	RF	89	S3	CNS	S. chromogenes	21
IA	8572	LF	663	S2	CNS	S. chromogenes	22
CA1	31075	RF	553	S2	CNS	S. chromogenes	23
CA1	31386	RR	473	S1	CNS	S. chromogenes	24
CA1	31094	RF	518	S1	CNS	S. chromogenes	25
CA1	29859	RF	572	S1	CNS	S. chromogenes	26
IA	14664	RF	625	S1	CNS	S. chromogenes	26
CA1	29958	RR	550	S3	CNS	S. chromogenes	26
CA1	26755	LF	491	S1	CNS	S. chromogenes	27
IA	14330	LF	717	S1	CNS	S. chromogenes	28
CA1	30879	RR	466	S3	CNS	S. chromogenes	29
CA2	5879	RR	48	S1	CNS	S. chromogenes	30
CA2	420	RF	95	S3	CNS	S. chromogenes	30
IA	10223	RF	712	S1	CNS	S. chromogenes	31
CA1	31142	RR	562	S3	CNS	S. chromogenes	32
IA	14503	RR	718	S1	CNS	S. chromogenes	33
CA1	26393	LR	507	S1	CNS	S. chromogenes	34
CA1	29007	LR/LF	516	S1	CNS	S. chromogenes	34
CA1	31326	LF	477	S1	CNS	S. chromogenes	34
MN	8465	LR	327	S1	CNS	S. chromogenes	35
WI1	1727	RR	200	S1	CNS	S. chromogenes	36
CA2	8784	RF	50	S1	CNS	S. chromogenes	37
CA2	8784	LF	49	S1	CNS	S. chromogenes	38
CA1	31132	RR	524	S1	CNS	S. chromogenes	39
CA2	8259	LR	151	S3	CNS	S. chromogenes	40
CA2	8627	RR	149	S3	CNS	S. chromogenes	40
CA1	27940	RR	512	S1	CNS	S. chromogenes	41
CA1	31143	LR	536	S1	CNS	S. chromogenes	42
CA2	8566	RF	35	S1	CNS	S. chromogenes	43
CA1	27858	RF	563	S3	CNS	S. chromogenes	44
CA1	28051	RR	519	S1	CNS	S. chromogenes	45
CA1	31871	LF	469	S2	CNS	S. chromogenes	45
CA1	28994	RR	582	S2	CNS	S. chromogenes	46
CA1	16970	LR	554	S2	CNS	S. chromogenes	47
CA1	29859	RR	501	S1	CNS	S. chromogenes	48
CA2	8455	LR	29	S1	CNS	S. chromogenes	50
MN	1940	LF	332	S1	CNS	S. chromogenes	50
CA1	31225	RF	506	S1	CNS	S. chromogenes	51
IA	14548	LF	637	S1	CNS	S. chromogenes	#N/A
CA1	31143	RR	537	S2	CNS	S. chromogenes	52
IA	13095	LF	687	S3	CNS	S. chromogenes	52
MN	1832	RR	341	S1	CNS	S. chromogenes	53
CA2	7925	RR	99	S2	CNS	S. chromogenes	54
IA	14859	RF	629	S1	CNS	S. chromogenes	#N/A
CA2	8435	LR	38	S1	CNS	S. chromogenes	55
CA2	8382	LR	154	S2	CNS	S. chromogenes	56
CA2	8259	RF	152	S3	CNS	S. chromogenes	56
CA2	8463	RR	34	S1	CNS	S. chromogenes	57
CA2	7194	RR	51	S1	CNS	S. chromogenes	58
CA2	8389	LR	45	S1	CNS	S. chromogenes	59
WI1	1541	LF	157	S1	CNS	S. chromogenes	59
CA1	30822	LR	545	S3	CNS	S. chromogenes	59
CA1	29194	RR	500	S1	CNS	S. chromogenes	60
CA1	31427	RR	528	S1	CNS	S. chromogenes	61
CA1	31330	RF	557	S3	CNS	S. chromogenes	61
MN	8242	RF	311	S1	CNS	S. chromogenes	#N/A
WI1	1727	LF	208	S1	CNS	S. chromogenes	62
CA2	7879	LR	76	S2	CNS	S. chromogenes	63
CA2	8300	LR	72	S3	CNS	S. chromogenes	63
CA2	8389	LF	46	S1	CNS	S. chromogenes	64
CA2	8338	RF	68	S2	CNS	S. chromogenes	64
WI1	9684	LR	234	S2	CNS	S. chromogenes	64
CA2	7879	LR	79	S3	CNS	S. chromogenes	64
CA2	8338	RF	70	S3	CNS	S. chromogenes	64
CA2	7729	RR	84	S2	CNS	S. chromogenes	65
IA	14651	RF	722	S1	CNS	S. chromogenes	66
MN	6442	LR	316	S1	CNS	S. chromogenes	66
WI1	1597	LR	172	S1	CNS	S. chromogenes	#N/A
WI1	1597	RR	174	S1	CNS	S. chromogenes	66
CA2	4826	RR	142	S3	CNS	S. chromogenes	68
WI1	1696	RF	178	S1	CNS	S. chromogenes	#N/A
CA1	16634	RR	502	S1	CNS	S. chromogenes	69
WI1	8399	RF	291	S1	CNS	S. chromogenes	69
CA2	8432	RR	96	S2	CNS	S. chromogenes	69
CA2	7856	RR	8	S1	CNS	S. chromogenes	70
WI1	1717	LR	294	S1	CNS	S. chromogenes	#N/A
CA2	8447	RF	20	S1	CNS	S. chromogenes	70
IA	14174	RR	605	S1	CNS	S. chromogenes	70
MN	6186	LR	315	S1	CNS	S. chromogenes	70
WI1	1734	RR	292	S1	CNS	S. chromogenes	70
WI1	9855	RR	199	S1	CNS	S. chromogenes	70
MN	5011	RF	369	S2	CNS	S. chromogenes	70
MN	6186	LR	391	S2	CNS	S. chromogenes	70
WI1	1095	LR	274	S2	CNS	S. chromogenes	70
WI1	6562	LR	231	S2	CNS	S. chromogenes	70
WI1	8645	RF	233	S2	CNS	S. chromogenes	70
WI1	8942	LR	281	S2	CNS	S. chromogenes	70
WI1	9808	RF	275	S2	CNS	S. chromogenes	70
WI1	1030	RR	227	S3	CNS	S. chromogenes	70
WI1	1779	RF	258	S3	CNS	S. chromogenes	70
CA2	8447	RF	109	CM	CNS	S. chromogenes	71
CA1	31394	RR	505	S1	CNS	S. chromogenes	71
CA2	8633	LR	82	S2	CNS	S. chromogenes	71
MN	8594	RF	342	S1	CNS	S. chromogenes	72
CA2	7856	RR	10	S2	CNS	S. chromogenes	72
CA1	31038	LF	521	S1	CNS	S. chromogenes	73
CA1	31088	LF	481	S1	CNS	S. chromogenes	73
IA	13221	LF	709	S1	CNS	S. chromogenes	73
IA	14173	LR	621	S1	CNS	S. chromogenes	73
MN	8292	RR	310	S1	CNS	S. chromogenes	73
MN	8441	LF	308	S1	CNS	S. chromogenes	73
WI1	1710	LR	216	S1	CNS	S. chromogenes	73
CA2	6579	LF	75	S2	CNS	S. chromogenes	73
CA2	7856	LF	80	S2	CNS	S. chromogenes	73
CA2	8432	RF	98	S2	CNS	S. chromogenes	73
MN	7309	LF	368	S2	CNS	S. chromogenes	73
MN	8203	LF	370	S2	CNS	S. chromogenes	73
IA	14194	LF	707	S3	CNS	S. chromogenes	73
MN	7309	LF	383	S3	CNS	S. chromogenes	73
CA2	8043	LR	11	S1	CNS	S. chromogenes	74
CA2	7264	LF	124	S2	CNS	S. chromogenes	#N/A
CA2	7695	LR	81	S2	CNS	S. chromogenes	#N/A
IA	13641	RF	633	S3	CNS	S. chromogenes	74
IA	14194	LR	710	S1	CNS	S. chromogenes	75
CA2	8447	RF	7	S3	CNS	S. chromogenes	75
CA1	29853	RR	480	S1	CNS	S. chromogenes	76
CA1	30516	RF	479	S1	CNS	S. chromogenes	76
CA1	31373	RF	527	S1	CNS	S. chromogenes	76
MN	6446	RR	303	S1	CNS	S. chromogenes	76
MN	8292	LR	309	S1	CNS	S. chromogenes	76
CA1	29441	RR	591	S2	CNS	S. chromogenes	76
CA1	29581	LF	548	S2	CNS	S. chromogenes	76
CA2	8043	RR	85	S2	CNS	S. chromogenes	76
CA2	8454	RR	15	S2	CNS	S. chromogenes	76
CA2	8382	RR	155	S2	CNS	S. chromogenes	#N/A
MN	228	RF	396	S2	CNS	S. chromogenes	76
CA2	8432	LF	97	S2	CNS	S. chromogenes	#N/A
CA2	8454	LR	16	S1	CNS	S. chromogenes	77
IA	10688	LF	641	S3	CNS	S. chromogenes	77
CA2	6579	RF	3	S1	CNS	S. chromogenes	78
CA2	8454	RR	14	S1	CNS	S. chromogenes	78
MN	8161	RF	307	S1	CNS	S. chromogenes	78
CA2	6579	RF	4	S2	CNS	S. chromogenes	78
CA1	31362	LF	559	S3	CNS	S. chromogenes	78
CA2	8454	LR	17	S3	CNS	S. chromogenes	78
IA	12441	RR	677	S2	CNS	S. chromogenes	#N/A
CA1	31003	LR	495	S1	CNS	S. chromogenes	79
IA	13060	RR	701	S2	CNS	S. chromogenes	#N/A
CA1	31253	RR	484	S1	CNS	S. chromogenes	79
IA	14556	LR	634	S2	CNS	S. chromogenes	#N/A
CA2	8109	LR	40	S1	CNS	S. chromogenes	79
IA	12412	RF	714	S1	CNS	S. chromogenes	79
IA	14859	LF	628	S1	CNS	S. chromogenes	79
IA	14891	RR	607	S1	CNS	S. chromogenes	79
WI1	1539	LR	207	S1	CNS	S. chromogenes	79
WI1	1710	RR	215	S1	CNS	S. chromogenes	79
CA1	24457	RR	571	S2	CNS	S. chromogenes	79
CA2	6579	LR	73	S2	CNS	S. chromogenes	79
WI1	1539	LR	286	S2	CNS	S. chromogenes	79
IA	10688	RF	642	S3	CNS	S. chromogenes	79
WI1	1391	LF	230	S3	CNS	S. chromogenes	79
CA1	31062	LF	511	S1	CNS	S. chromogenes	80
WI1	9848	RF	226	S3	CNS	S. chromogenes	80
WI1	1772	RR	210	S1	CNS	S. chromogenes	81
CA1	31038	LF	587	S2	CNS	S. chromogenes	81
WI1	1391	LF	186	S1	CNS	S. chromogenes	82
WI1	1710	RF	212	S1	CNS	S. chromogenes	82
WI1	9888	LR	289	S1	CNS	S. chromogenes	83
CA1	31062	lf	589	S2	CNS	S. chromogenes	83
CA1	31513	LF	510	S1	CNS	S. chromogenes	84
CA2	8140	LR	22	S1	CNS	S. chromogenes	84
WI1	1655	RF	158	S1	CNS	S. chromogenes	84
CA1	30067	RR	485	S1	CNS	S. chromogenes	85
CA2	8429	LR	31	S1	CNS	S. chromogenes	86
CA2	8429	RR	32	S1	CNS	S. chromogenes	87
IA	14247	RF	598	S1	CNS	S. chromogenes	88
CA1	31123	RR	529	S1	CNS	S. chromogenes	89
CA1	29958	RR	732	S1	CNS	S. chromogenes	90
IA	10075	RR	719	S1	CNS	S. chromogenes	91
CA1	31518	RR	522	S1	CNS	S. chromogenes	92
CA1	31444	RR	564	S3	CNS	S. chromogenes	93
IA	14037	RR	603	S1	CNS	S. chromogenes	94
CA2	8259	RR	112	S2	CNS	S. chromogenes	94
WI1	8971	LF	171	S1	CNS	S. chromogenes	95
WI1	1645	RF	277	S2	CNS	S. chromogenes	95
CA2	4732	RF	2	S3	CNS	S. chromogenes	96
CA2	7878	RF	41	S1	CNS	S. chromogenes	97
CA2	8389	RF	47	S1	CNS	S. chromogenes	98
CA2	6960	RF	27	S1	CNS	S. chromogenes	99
IA	12910	RR	630	S2	CNS	S. chromogenes	100
CA1	31562	RR	474	S1	CNS	S. chromogenes	101
CA2	7729	RF	55	S1	CNS	S. chromogenes	102
IA	14300	RR	716	S1	CNS	S. chromogenes	103
CA1	31038	LR	520	S1	CNS	S. chromogenes	104
CA1	16980	LF	583	S3	CNS	S. chromogenes	105
WI1	6895	LR	225	S3	CNS	S. chromogenes	106
CA1	29375	LR	487	S1	CNS	S. chromogenes	107
CA2	6579	RF	5	S3	CNS	S. chromogenes	#N/A
CA2	8627	LR	148	S3	CNS	S. chromogenes	107
CA2	7729	RR	91	S3	CNS	S. chromogenes	#N/A
CA2	4826	RR	116	S2	CNS	S. chromogenes	108
CA2	8463	LF	77	S2	CNS	S. chromogenes	108
CA2	8043	RR	92	S3	CNS	S. chromogenes	#N/A
CA1	31515	LF	586	S3	CNS	S. chromogenes	108
CA1	16735	LF	558	S3	CNS	S. chromogenes	109
MN	1915	LF	357	S1	CNS	S. chromogenes	110
MN	8285	RR	373	S2	CNS	S. chromogenes	110
CA1	27429	LF	566	S3	CNS	S. chromogenes	110
MN	8197	LF	405	S3	CNS	S. chromogenes	110
MN	2543	RR	445	S2	CNS	S. chromogenes	111
CA2	8059	LR	30	S1	CNS	S. chromogenes	112
CA2	7212	RF	147	S3	CNS	S. chromogenes	113
IA	12412	LF	643	S3	CNS	S. chromogenes	114
IA	14225	RF	698	S2	CNS	S. chromogenes	115
MN	263	RF	453	S3	CNS	S. chromogenes	116
CA1	16735	LR	588	S2	CNS	S. chromogenes	117
CA2	8459	RF	62	S1	CNS	S. chromogenes	118
WI1	1698	LF	183	S1	CNS	S. chromogenes	119
CA1	28174	RF	547	S2	CNS	S. chromogenes	120
WI1	8962	RF	241	S2	CNS	S. chromogenes	121
IA	8264	LR	662	S2	CNS	S. chromogenes	122
CA1	28418	RF	561	S2	CNS	S. chromogenes	123
CA1	25741	LR	593	S3	CNS	S. chromogenes	124
CA1	27907	RR	592	S3	CNS	S. chromogenes	125
CA1	29007	RF	515	S1	CNS	S. chromogenes	126
IA	13167	LF	708	S1	CNS	S. chromogenes	127
MN	8465	LF	328	S1	CNS	S. chromogenes	128
IA	14597	RR	619	S2	CNS	S. chromogenes	129
MN	6186	LR	424	S3	CNS	S. chromogenes	#N/A
MN	1915	LR	354	S1	CNS	S. chromogenes	130
MN	7002	LR	412	S3	CNS	S. chromogenes	#N/A
WI1	9855	LR	282	S2	CNS	S. chromogenes	130
MN	1754	LF	319	S1	CNS	S. chromogenes	131
IA	10774	LF	596	S1	CNS	S. chromogenes	132
MN	8463	RR	435	S3	CNS	S. chromogenes	#N/A
CA1	31638	LF	489	S1	CNS	S. chromogenes	133
WI1	9405	LF	196	S1	CNS	S. chromogenes	134
WI1	1734	RR	279	S2	CNS	S. chromogenes	135
WI1	9518	RR	164	S1	CNS	S. chromogenes	136
CA2	8178	RR	42	S1	CNS	S. chromogenes	137
WI1	1718	RR	243	S2	CNS	S. chromogenes	138
IA	14291	LF	599	S1	CNS	S. cohnii	#N/A
MN	7421	LR	304	S1	CNS	S. cohnii	#N/A
MN	8491	RF	314	S1	CNS	S. cohnii	#N/A
WI1	1479	LR	179	S1	CNS	S. cohnii	0
WI1	1758	RF	733	S1	CNS	S. cohnii	0
CA2	4657	RF	156	S2	CNS	S. cohnii	#N/A
IA	13342	RF	671	S2	CNS	S. cohnii	0
IA	14548	RR	679	S2	CNS	S. cohnii	0
MN	8179	RF	744	S3	CNS	S. cohnii	0
IA	13027	LR	715	S1	CNS	S. devriesei	#N/A
MN	2500	LR	336	S1	CNS	S. devriesei	#N/A
MN	6442	LF	318	S1	CNS	S. devriesei	#N/A
MN	8143	RF	313	S1	CNS	S. devriesei	#N/A
MN	8612	LF	736	S1	CNS	S. devriesei	#N/A
MN	8612	RF	353	S1	CNS	S. devriesei	#N/A
WI1	1315	RR	163	S1	CNS	S. devriesei	#N/A
MN	8424	RF	364	S2	CNS	S. devriesei	#N/A
WI1	9910	RF	276	S2	CNS	S. devriesei	#N/A
IA	1019	RF	690	S3	CNS	S. devriesei	#N/A
IA	10774	LR	647	S3	CNS	S. devriesei	#N/A
MN	2543	RR	452	S3	CNS	S. devriesei	#N/A
CA1	27855	LF	509	S1	CNS	S. epidermidis	#N/A
CA1	31143	LF	538	S1	CNS	S. epidermidis	#N/A
CA2	1780	LR	44	S1	CNS	S. epidermidis	1
CA2	4732	RF	1	S1	CNS	S. epidermidis	7
CA2	4732	LR	63	S1	CNS	S. epidermidis	#N/A
CA2	6594	RF	53	S1	CNS	S. epidermidis	0
CA2	7194	RF	54	S1	CNS	S. epidermidis	5
CA2	8040	RF	21	S1	CNS	S. epidermidis	#N/A
CA2	8257	LF	59	S1	CNS	S. epidermidis	9
CA2	8459	LF	61	S1	CNS	S. epidermidis	#N/A
IA	14797	LR	626	S1	CNS	S. epidermidis	6
MN	6445	LR	329	S1	CNS	S. epidermidis	#N/A
MN	7138	LF	345	S1	CNS	S. epidermidis	#N/A
MN	8039	LF	334	S1	CNS	S. epidermidis	#N/A
WI1	1562	RF	299	S1	CNS	S. epidermidis	#N/A
WI1	1562	RR	161	S1	CNS	S. epidermidis	4
WI1	9332	LF	160	S1	CNS	S. epidermidis	11
IA	14503	RR	618	S2	CNS	S. epidermidis	#N/A
CA1	30919	LF	539	S2	CNS	S. epidermidis	13
CA2	8429	RF	71	S2	CNS	S. epidermidis	#N/A
IA	14859	LR	636	S2	CNS	S. epidermidis	0
MN	7138	RF	390	S2	CNS	S. epidermidis	#N/A
MN	8179	RF	394	S2	CNS	S. epidermidis	#N/A
MN	8269	RF	362	S2	CNS	S. epidermidis	12
MN	8269	RF	363	S2	CNS	S. epidermidis	#N/A
MN	8269	LR	365	S2	CNS	S. epidermidis	#N/A
CA1	30487	LF	543	S3	CNS	S. epidermidis	#N/A
CA1	30893	RF	542	S3	CNS	S. epidermidis	0
CA2	7974	RR	145	S3	CNS	S. epidermidis	#N/A
CA2	8259	LF	153	S3	CNS	S. epidermidis	#N/A
CA2	8578	RF	90	S3	CNS	S. epidermidis	#N/A
IA	7615	LF	655	S3	CNS	S. epidermidis	#N/A
IA	12770	LF	632	S3	CNS	S. epidermidis	3
MN	6445	LR	434	S3	CNS	S. epidermidis	2
MN	7138	RF	429	S3	CNS	S. epidermidis	10
MN	8292	RR	382	S3	CNS	S. epidermidis	#N/A
MN	8491	RR	431	S3	CNS	S. epidermidis	0
WI1	1741	LF	260	S3	CNS	S. epidermidis	8
WI1	9910	RR	257	S3	CNS	S. epidermidis	#N/A
CA1	31306	LR	483	S1	CNS	S. equorum	#N/A
IA	12770	LF	620	S3	CNS	S. equorum	#N/A
CA1	21524	LR	503	S1	CNS	S. gallinarium	#N/A
CA2	7887	LF	86	S2	CNS	S. haemolyticus	1
WI1	1667	LF	283	S2	CNS	S. haemolyticus	2
IA	10307	RR	613	S3	CNS	S. haemolyticus	3
MN	8232	LR	441	S2	CNS	S. haemolyticus	4
WI1	1095	RR	271	S3	CNS	S. haemolyticus	5
WI1	1287	LF	278	S2	CNS	S. haemolyticus	5
WI1	1539	RR	285	S2	CNS	S. haemolyticus	5
WI1	1584	LR	194	S1	CNS	S. haemolyticus	5
WI1	1738	LF	201	S1	CNS	S. haemolyticus	5
MN	5132	LF	376	S3	CNS	S. haemolyticus	5
MN	6231	RR	436	S2	CNS	S. haemolyticus	5
MN	6250	LR	321	S1	CNS	S. haemolyticus	5
MN	6414	RF	346	S1	CNS	S. haemolyticus	5
MN	8518	RR	348	S1	CNS	S. haemolyticus	5
WI1	9888	LR	270	S3	CNS	S. haemolyticus	5
IA	12730	RR	686	S3	CNS	S. haemolyticus	6
WI1	1641	LF	219	S2	CNS	S. haemolyticus	7
WI1	9581	RR	301	S1	CNS	S. haemolyticus	8
IA	1655	RR	615	S2	CNS	S. haemolyticus	9
WI1	8645	LF	249	S3	CNS	S. haemolyticus	10
WI1	1525	LF	236	S2	CNS	S. haemolyticus	11
WI1	1525	LF	262	S3	CNS	S. haemolyticus	11
MN	8442	LR	457	S3	CNS	S. haemolyticus	11
CA1	26901	LR	534	S2	CNS	S. haemolyticus	12
WI1	1030	LR	166	S1	CNS	S. haemolyticus	#N/A
CA1	27429	RR	565	S3	CNS	S. haemolyticus	13
WI1	1287	LF	169	S1	CNS	S. haemolyticus	14
WI1	1287	LF	268	S3	CNS	S. haemolyticus	14
WI1	1684	RF	168	S1	CNS	S. haemolyticus	14
IA	14493	LF	678	S2	CNS	S. haemolyticus	15
CA2	6556	RF	102	S2	CNS	S. haemolyticus	16
MN	8218	RR	448	S2	CNS	S. haemolyticus	16
MN	8615	LR	459	S3	CNS	S. haemolyticus	16
WI1	8962	LR	198	S1	CNS	S. haemolyticus	16
IA	13342	LR	666	S2	CNS	S. haemolyticus	16
IA	14599	RF	638	S1	CNS	S. haemolyticus	17
MN	8518	RF	351	S1	CNS	S. haemolyticus	18
WI1	1368	RR	237	S2	CNS	S. haemolyticus	19
WI1	1697	RF	269	S3	CNS	S. haemolyticus	19
IA	14194	RF	645	S2	CNS	S. haemolyticus	19
WI1	1624	LF	253	S3	CNS	S. haemolyticus	20
WI1	8645	LF	232	S2	CNS	S. haemolyticus	21
WI1	1287	RF	266	S3	CNS	S. haemolyticus	22
WI1	1634	LF	238	S2	CNS	S. haemolyticus	22
IA	13326	LF	664	S2	CNS	S. haemolyticus	22
IA	14728	RR	667	S2	CNS	S. haemolyticus	#N/A
IA	14656	RF	689	S3	CNS	S. haemolyticus	22
WI1	1422	LF	297	S1	CNS	S. haemolyticus	23
IA	10223	RR	713	S1	CNS	S. haemolyticus	24
CA2	8300	RR	66	S2	CNS	S. haemolyticus	25
MN	8441	LF	372	S2	CNS	S. haemolyticus	26
IA	12825	RR	608	S2	CNS	S. haemolyticus	27
WI1	8942	LF	185	S1	CNS	S. haemolyticus	28
MN	8303	LF	331	S1	CNS	S. haemolyticus	29
MN	8438	LR	305	S1	CNS	S. haemolyticus	30
WI1	1494	RF	222	S2	CNS	S. haemolyticus	31
WI1	1667	LR	254	S3	CNS	S. haemolyticus	31
MN	8411	LF	381	S3	CNS	S. haemolyticus	31
WI1	9405	RR	239	S2	CNS	S. haemolyticus	32
WI1	6562	LF	251	S3	CNS	S. haemolyticus	33
MN	8460	RR	458	S3	CNS	S. haemolyticus	34
WI1	1634	RF	240	S2	CNS	S. haemolyticus	35
IA	11908	LF	649	S2	CNS	S. haemolyticus	36
MN	8303	LF	389	S2	CNS	S. haemolyticus	37
WI1	9820	LF	295	S1	CNS	S. haemolyticus	38
IA	14524	LF	673	S2	CNS	S. haemolyticus	41
WI1	1385	LF	293	S1	CNS	S. haemolyticus	43
WI1	1684	RR	197	S1	CNS	S. haemolyticus	43
WI1	9456	RF	187	S1	CNS	S. haemolyticus	43
WI1	9848	RF	184	S1	CNS	S. haemolyticus	44
WI1	9888	LF	261	S3	CNS	S. haemolyticus	45
IA	7615	LR	656	S3	CNS	S. haemolyticus	46
WI1	8360	RF	298	S1	CNS	S. haemolyticus	47
WI1	1779	LF	263	S3	CNS	S. haemolyticus	48
MN	8161	LF	306	S1	CNS	S. haemolyticus	49
WI1	9456	RF	221	S2	CNS	S. haemolyticus	50
CA1	30470	LF	478	S1	CNS	S. haemolyticus	51
CA1	31190	LR	486	S1	CNS	S. haemolyticus	52
IA	14794	LF	661	S3	CNS	S. haemolyticus	53
WI1	8905	RF	176	S1	CNS	S. haemolyticus	54
CA1	25535	RF	467	S2	CNS	S. haemolyticus	55
WI1	1712	RR	242	S2	CNS	S. haemolyticus	56
WI1	6895	RF	300	S1	CNS	S. haemolyticus	56
WI1	8399	LF	213	S1	CNS	S. haemolyticus	56
WI1	8803	RF	272	S3	CNS	S. haemolyticus	56
WI1	9848	RR	170	S1	CNS	S. haemolyticus	56
MN	6120	LR	399	S3	CNS	S. haemolyticus	#N/A
MN	7323	LR	385	S3	CNS	S. haemolyticus	#N/A
MN	7397	LR	420	S3	CNS	S. haemolyticus	#N/A
WI1	9877	LR	192	S1	CNS	S. haemolyticus	56
MN	8418	RF	409	S3	CNS	S. haemolyticus	#N/A
WI1	1391	RF	195	S1	CNS	S. haemolyticus	57
WI1	1479	LF	189	S1	CNS	S. haemolyticus	57
WI1	8399	RR	217	S1	CNS	S. haemolyticus	58
CA1	31386	LR	472	S1	CNS	S. haemolyticus	60
CA1	29479	RF	471	S1	CNS	S. haemolyticus	61
MN	8162	RR	325	S1	CNS	S. haemolyticus	62
IA	14586	LF	680	S2	CNS	S. haemolyticus	63
IA	14563	RR	631	S2	CNS	S. haemolyticus	66
MN	7397	RF	438	S2	CNS	S. haemolyticus	67
CA1	31536	RF	498	S1	CNS	S. haemolyticus	69
WI1	1727	RR	267	S3	CNS	S. haemolyticus	#N/A
CA2	8043	LF	43	S1	CNS	S. haemolyticus	74
CA2	8043	LR	12	S2	CNS	S. haemolyticus	76
WI1	1624	RR	734	S2	CNS	S. haemolyticus	84
IA	14435	RR	727	S2	CNS	S. haemolyticus	84
IA	12253	LR	614	S3	CNS	S. haemolyticus	85
IA	13957	RF	723	S1	CNS	S. hominis	#N/A
IA	14359	RR	623	S1	CNS	S. hominis	3
IA	14831	RR	711	S1	CNS	S. hominis	5
WI1	1287	RF	204	S1	CNS	S. hominis	12
WI1	1385	LR	296	S1	CNS	S. hominis	17
WI1	1479	RR	191	S1	CNS	S. hominis	#N/A
WI1	1519	RF	175	S1	CNS	S. hominis	#N/A
WI1	1613	RF	182	S1	CNS	S. hominis	#N/A
WI1	1741	RR	203	S1	CNS	S. hominis	1
WI1	8963	LF	214	S1	CNS	S. hominis	15
IA	1720	RF	696	S2	CNS	S. hominis	4
IA	2026	LF	697	S2	CNS	S. hominis	#N/A
IA	14310	LF	610	S2	CNS	S. hominis	14
IA	14357	RF	611	S2	CNS	S. hominis	8
IA	14584	RF	695	S2	CNS	S. hominis	5
MN	8469	LR	392	S2	CNS	S. hominis	4
WI1	1758	LF	247	S2	CNS	S. hominis	11
WI1	8942	RF	280	S2	CNS	S. hominis	#N/A
CA2	20391	RR	39	S3	CNS	S. hominis	7
IA	915	LF	646	S3	CNS	S. hominis	9
IA	11106	LR	684	S3	CNS	S. hominis	5
IA	12682	RR	660	S3	CNS	S. hominis	14
MN	8441	LF	386	S3	CNS	S. hominis	6
WI1	1637	LR	248	S3	CNS	S. hominis	16
WI1	1739	LF	252	S3	CNS	S. hominis	13
WI1	8035	LF	250	S3	CNS	S. hominis	10
WI1	8399	LR	290	S3	CNS	S. hominis	18
WI1	9733	LR	224	S3	CNS	S. hominis	2
CA1	30310	LF	546	S3	CNS	S. hyicus	#N/A
CA2	3422	LR	105	S3	CNS	S. hyicus	#N/A
CA2	3422	RF	106	S3	CNS	S. hyicus	#N/A
CA1	29507	RF	573	S2	CNS	S. microti	#N/A
CA1	31298	LR	570	S2	CNS	S. microti	#N/A
MN	8373	LR	356	S1	CNS	S. pasteuri	#N/A
IA	14524	RR	674	S2	CNS	S. pasteuri	#N/A
CA2	8109	LF	104	S3	CNS	S. pasteuri	#N/A
MN	2500	RF	349	S1	CNS	S. pasteuri	#N/A
CA2	6960	RR	150	S3	CNS	S. pasteuri	#N/A
CA1	29649	LF	567	S2	CNS	S. rostri	#N/A
MN	1754	LR	360	S2	CNS	S. rostri	#N/A
MN	6219	LF	404	S3	CNS	S. saphrophyticus	#N/A
CA1	27855	RR	508	S1	CNS	S. sciuri	7
CA1	31284	LR	513	S1	CNS	S. sciuri	8
CA2	6450	LF	57	S1	CNS	S. sciuri	#N/A
CA2	8633	RF	36	S1	CNS	S. sciuri	#N/A
MN	7408	RF	320	S1	CNS	S. sciuri	6
WI1	1030	RF	167	S1	CNS	S. sciuri	10
CA2	7156	LF	138	S2	CNS	S. sciuri	1
IA	11404	LR	675	S2	CNS	S. sciuri	5
IA	11845	RF	669	S2	CNS	S. sciuri	3
IA	12383	RR	676	S2	CNS	S. sciuri	#N/A
IA	13320	LR	616	S2	CNS	S. sciuri	4
CA2	4701	RR	136	S3	CNS	S. sciuri	2
WI1	1613	RF	229	S3	CNS	S. sciuri	9
MN	5132	LR	462	CM	CNS	S. simulans	13
MN	7268	RF	465	CM	CNS	S. simulans	13
MN	8292	RF	464	CM	CNS	S. simulans	19
IA	1857	LF	597	S1	CNS	S. simulans	9
IA	14166	LF	604	S1	CNS	S. simulans	#N/A
IA	14418	RF	600	S1	CNS	S. simulans	9
IA	14524	LF	724	S1	CNS	S. simulans	8
IA	14891	LF	606	S1	CNS	S. simulans	14
MN	7268	LF	337	S1	CNS	S. simulans	16
MN	8039	RF	324	S1	CNS	S. simulans	5
WI1	8971	RF	165	S1	CNS	S. simulans	3
WI1	9012	RF	211	S1	CNS	S. simulans	21
IA	6812	LF	640	S2	CNS	S. simulans	12
IA	11845	LR	726	S2	CNS	S. simulans	1
IA	13326	LR	728	S2	CNS	S. simulans	20
IA	14873	RF	612	S2	CNS	S. simulans	2
MN	263	RF	449	S2	CNS	S. simulans	17
MN	5132	LF	361	S2	CNS	S. simulans	15
MN	6324	LF	740	S2	CNS	S. simulans	10
MN	7268	RF	388	S2	CNS	S. simulans	13
MN	7506	LF	443	S2	CNS	S. simulans	19
MN	7506	RR	446	S2	CNS	S. simulans	19
MN	8292	RF	366	S2	CNS	S. simulans	18
WI1	1712	LF	246	S2	CNS	S. simulans	4
WI1	8399	LF	288	S2	CNS	S. simulans	22
WI1	9012	RF	244	S2	CNS	S. simulans	11
IA	6430	RR	639	S3	CNS	S. simulans	#N/A
IA	12412	RF	644	S3	CNS	S. simulans	7
IA	13326	LR	688	S3	CNS	S. simulans	20
MN	5132	LR	378	S3	CNS	S. simulans	13
MN	5132	LF	379	S3	CNS	S. simulans	15
MN	6324	LF	413	S3	CNS	S. simulans	10
MN	7268	RF	416	S3	CNS	S. simulans	13
MN	7506	LF	427	S3	CNS	S. simulans	19
MN	7506	RR	460	S3	CNS	S. simulans	19
MN	8269	LR	377	S3	CNS	S. simulans	15
MN	8292	RF	384	S3	CNS	S. simulans	17
MN	8337	RF	432	S3	CNS	S. simulans	13
WI1	1712	LF	265	S3	CNS	S. simulans	6
MN	8285	LR	371	S2	CNS	S. succinus	#N/A
MN	6414	LR	355	S1	CNS	S. warneri	#N/A
CA1	30949	RR	540	S2	CNS	S. warneri	#N/A
CA1	31299	RR	544	S3	CNS	S. warneri	#N/A
MN	7254	LF	430	S3	CNS	S. warneri	#N/A
MN	8491	LF	407	S3	CNS	S. warneri	#N/A
MN	8491	LF	433	S3	CNS	S. warneri	#N/A
MN	8337	LR	442	S2	CNS	S. xylosus	#N/A
MN	8546	LF	439	S2	CNS	S. xylosus	#N/A
IA	6796	RR	682	S3	CNS	S. xylosus	#N/A
MN	7397	RR	415	S3	CNS	S. xylosus	#N/A
MN	8438	RF	374	S2	CNS	S. auricularis	5
MN	8239	LF	387	S2	CNS	S. haemolyticus	86

## Sheet: Dictionary
LF = Left front
LR = Left rear
RR = Right rear
RF = Right front
S1 = Dry off
S2 = Calving (0-6 DIM)
S3 = Post calving (7-13 DIM)
CM = Clinical mastitis within 100 DIM
NA=Not applicable
